# Supplementary material for: The Impact of a Change in Employment on Three Work-Related Diseases: A Retrospective Longitudinal Study of 10,530 Belgian Employees
Source: MDPI journal article supplement (doi:10.3390/ijerph17207477), 2020-10-14
Supplement: s1 [file s1]

Supplementary Table S1. List of risk factors

---

Safety risks and hindrance  
Lack of physical exercise  
Suffocation in oxygen-poor environment  
Conflicts with customers  
Stress at work  
Burnout  
Improper or unacceptable behavior (being victim of violence (physical) and bullying and incivility (non-physical))  
Obesity  
Noise 87dB  
Noise 85dB  
Noise 80dB  
Physical load  
Manual handling of loads  
Manual lifting, holding, carrying  
Manual pulling and pushing  
Manual repetitive tasks  
Static load  
Shift work without job-specific risks  
Shift work with job-specific risks  
Night work task-specific particular risks  
Night work task-specific particular risks  
Mental load due to environmental noise  
Psychosocial load

---
